# Supplementary material for: Direct and widespread role for the nuclear receptor EcR in mediating the response to ecdysone in Drosophila
Source: PubMed Central journal article supplement — Proc Natl Acad Sci U S A. 2019 Apr 24;116(20):9893–902. doi: 10.1073/pnas.1900343116 (PMC6525475; doi:10.1073/pnas.1900343116), 2019-04-24
Supplement: pnas.1900343116.sapp.pdf [file pnas.1900343116.sapp.pdf]

## Supplementary Information for

A direct and widespread role for the nuclear receptor EcR in mediating the response to ecdysone in *Drosophila*

Christopher M. Uyehara and Daniel J. McKay

Daniel J. McKay  
Email: dmckay1@email.unc.edu

### **This PDF file includes:**

Supplementary text  
Figs. S1 to S12  
Tables S1 to S4  
References for SI reference citations

### **Other supplementary materials for this manuscript include the following:**

Datasets S1 to S5

## Supplementary Materials and Methods

### Western Blots

For each sample, 40 wings were lysed directly in Laemmli sample buffer preheated to 95C. Samples were run on a BioRad 7.5% Mini-Protean TGX gel at 90V for 60m and then transferred to a nitrocellulose membrane at 100V for 60m. Membranes were blocked in 5% carnation instant milk for 30m at room temperature (RT) or overnight at 4C. Primary and secondary antibodies were incubated for 2hr at RT using four washes with 1XTBST between incubations. The following antibody concentrations were used to probe blots: 1:1000 mouse anti-EcR (DSHB DDA2.7, concentrate); 1:1000 anti-EcR-A (DSHB 15G1a, concentrate), 1:1000 anti-EcR-B1 (DSHB AD4.4, concentrate); 1:5000 rabbit anti-GFP (Abcam ab290); 1:30000 mouse anti-alpha Tubulin (Sigma T6074); 1:5000 goat anti-mouse IgG, HRP-conjugated (Fisher 31430); 1:5000 donkey anti-rabbit, HRP-conjugated (GE Healthcare NA934). Membranes were imaged on a GE Amersham Imager 600.

### Transgenic Reporter Construction

Candidate enhancers were cloned into the pΦUGG destination vector (1) and integrated into the attP2 site. Primer sequences are available upon request.

### Immunofluorescence

Immunostaining was performed as described previously (2). For mitotic clones, *usp3 FRT19A / Ubi-RFP, hs-FLP, FRT19A; Enhancer-GAL4 / UAS-dsGFP* animals were heat-shocked at 24-48hrs AEL. The following antibody concentrations were used: 1:750 mouse anti-EcR (DSHB DDA2.7, concentrate), 1:4000 rabbit anti-GFP (Abcam ab290), 1:3500 mouse anti-Dl (DSHB C594.9b, concentrate), 1:200 mouse anti-FLAG M2 (Sigma F1804), 1:10 mouse anti-Achaete (DSHB anti-Achaete, supernatant), 1:1000 anti-Br (DSHB 25E9.D7, concentrate). Samples were imaged on a Leica Sp5 confocal microscope.

### **Sample preparation for RNAseq**

A minimum of 60 wings were prepared as previously described (2) from either *Oregon R* (WT) or *yw; vg-GAL4, Tub>>CD2>>GAL4, UAS-GFP, UAS-FLP / UAS-EcR-RNAi<sup>104</sup>* (EcR-RNAi). For library construction, 50-100ng RNA was used as input to the Ovation *Drosophila* RNA-Seq System. Single-end, 1x50 sequencing was performed on an Illumina HiSeq 2500 at the UNC High Throughput Sequencing Facility.

### **Sample preparation for CUT&RUN**

A minimum of 100 wings from *w; EcR<sup>GFSTF</sup>/Df(2R)BSC889* were dissected in 1XPBS. Samples were centrifuged at 800g for 5 minutes at 4C and washed twice with dig-wash buffer (20mM HEPES-NaOH, 150mM NaCl, 2mM EDTA, 0.5mM Spermidine, 10mM PMSF, 0.05% digitonin) and incubated in primary antibody for 2hrs at 4C. Samples were washed as before and incubated in secondary antibody for 2hrs. Samples were washed as before and incubated for 1hr with protein-A MNase. Samples were washed twice in dig-wash buffer without EDTA and then resuspended in 150uL dig-wash buffer without EDTA. Following this, samples were equilibrated to 0C in an ice bath. 2uL CaCl<sub>2</sub> (100mM) was added to activate MNase and digestion allowed to proceed for 45s before treating with 150uL 2XRSTOP+ buffer (200mM NaCl, 20mM EDTA, 4mM EGTA, 50ug/ml RNase, 40ug/ml glycogen, 2pg/ml yeast spike-in DNA). Soluble fragments were released by incubating at 37C for 10m. Samples were spun twice at 800g, 5m at 4C and the aqueous phase removed. The rest of the protocol was performed as described in Skene et al., 2018 (3). For library preparation, the Rubicon ThruPLEX 12s DNA-seq kit was used following the manufacturer's protocol until the amplification step. For amplification, after the addition of indexes, 16-21 cycles of 98C, 20s; 67C, 10s were run. A 1.2x SPRI bead cleanup was performed (Agencourt Ampure XP). Libraries were sequenced on an Illumina MiSeq. The following antibody concentrations were used: 1:300 mouse anti-FLAG M2 (Sigma F1804); 1:200 rabbit anti-Mouse (Abcam ab46450); 1:400 Batch#6 proteinA-MNase (from Steven Henikoff).

## **RNA Sequencing Analysis**

Reads were aligned with STAR (2.5.1b) (4). Indexes for STAR were generated with parameter `--sjdbOverhang 49` using genome files for the dm3 reference genome. The STAR aligner was run with parameters `--alignIntronMax 50000 --alignMatesGapMax 50000`. Subread (v1.24.2) was used to count reads mapping to features (5). DESeq2 (v1.14.1) was used to identify differentially expressed genes using the `lfcShrink` function to shrink log-fold changes (6). Differentially expressed genes were defined as genes with an adjusted p-value less than 0.05 and a  $\log_2$ -fold change greater than 2. Normalized counts were generated using the `counts` function in DESeq2. For k-medoids clustering, normalized counts were first converted into the fraction of maximum WT counts and clustering was performed using the `cluster` package in R. Optimal cluster number was determined by minimizing the cluster silhouette. Heatmaps were generated using `pheatmap` (v1.0.10) in R. Gene Ontology analysis was performed using Bioconductor packages `TopGO` (v2.26.0) and `GenomicFeatures` (v1.26.4) using expressed genes as a background set with parameters: `algorithm = 'elim'` and `statistic = 'fisher'`. (7, 8). Expressed genes were defined as genes that remained after DESeq2 performed independent filtering to remove genes with low counts.

## **CUT&RUN Sequencing Analysis**

Technical replicates were merged by concatenating fastq files. Reads were trimmed using `bbmap` (v37.50) with parameters `ktrim=4 ref=adapters rcomp=t tpe=t tbo=t hdist=1 mink=11`. Trimmed reads were aligned to the dm3 reference genome using `Bowtie2` (v2.2.8) with parameters `--local --very-sensitive-local --no-unal --no-mixed --no-discordant --phred33 -I 10 -X 700` (9). Reads with a quality score less than 5 were removed with `samtools` (v1.3.1) (10). PCR duplicates were marked with `Picard` (v2.2.4) and then removed with `samtools`. Bam files were converted to bed files with `bedtools` (v2.25.0) with parameter `-bedpe` and split into different fragment size categories using `awk` (11). Bedgraphs were generated with `bedtools` and then converted into bigwigs with `ucscTools` (v320) (12). Data was z-normalized using a custom R script. MACS

(v2016-02-15) was used to call peaks on individual replicates and merged files using a control genomic DNA file from sonicated genomic DNA using parameters `-g 121400000 --nomodel --seed 123` (13). A final peak set was obtained by using peaks that were called in the merged file that overlapped with a peak called in at least one replicate. Heatmaps and average signal plots were generated from z-normalized data using the Bioconductor package `Seqplots` (v1.18.0). `ChIPpeakAnno` (v3.14.0) was used to calculate distance of peaks to their nearest gene (14, 15). Gene ontology analysis was performed as described for RNA-seq data, except that all genes were used as a background set. To identify clusters of EcR binding sites, the EcR peaks were resized to 5000bp, assigned to clusters, and the furthest start and end coordinate of the original peaks were used. To shuffle clusters, `bedtools shuffle` was used using `--seed 100`, including `(-incl)` peaks from WT FAIRE (2)

### **Motif Analysis**

*De novo* motif analysis was performed using `DREME` (v4.12.0) using parameters `-maxk 13 -t 18000 -e 0.05` (16). As background sequences, FAIRE peaks from -6hAPF or +6hAPF were used. To identify occurrences of the EcR motif in the genome, PWMs for the EcR and Usp motifs identified by a bacterial 1-hybrid were obtained from Fly Factor Survey (17). For the palindromic, Usp/EcR motif, the PWMs for EcR and Usp were concatenated together and the probabilities for the central, overlapping base were averaged. `FIMO` (v4.12.0) was run on the dm3 reference genome using parameters `--max-stored-scores 10000000 --max-strand --no-qvalue --parse-genomic-coord --verbosity 4 --thresh 0.01` (18). Motif density plots were generated by counting the number of motifs around peak summits (10bp bins) and normalizing by the number of input peaks.

### **Drosophila culture and genetics**

Flies were grown at 25C under standard culture conditions. Late wandering larvae were used as the -6hAPF timepoint. White prepupae were used as the 0h time point for staging +6hAPF animals. For 96hAEL, apple juice plates with embryos were cleared of any larvae and then four

hours later any animals that had hatched were transferred to vials. The following genotypes were used:

*yw; vg-GAL4, UAS-FLP, UAS-GFP, Tub>>CD2>>GAL4 / CyO* (19)

*w<sup>1118</sup>; P{UAS-EcR-RNAi}104* (BDSC#9327)

*yw; EcR<sup>GFSTF</sup>* (BDSC#59823)

*w<sup>1118</sup>; Df(2R)BSC889/CyO* (BDSC#32253)

*UAS-dsGFP* (gift of Brian McCabe)

*usp3, w\*, P{neoFRT}19A/FM7c* (BDSC#64295)

*P{Ubi-mRFP.nls}1, w\*, P{hsFLP}12 P{neoFRT}19A* (BDSC#31418)

*w; UAS-EcR.B2.W650A* (BDSC#9449)

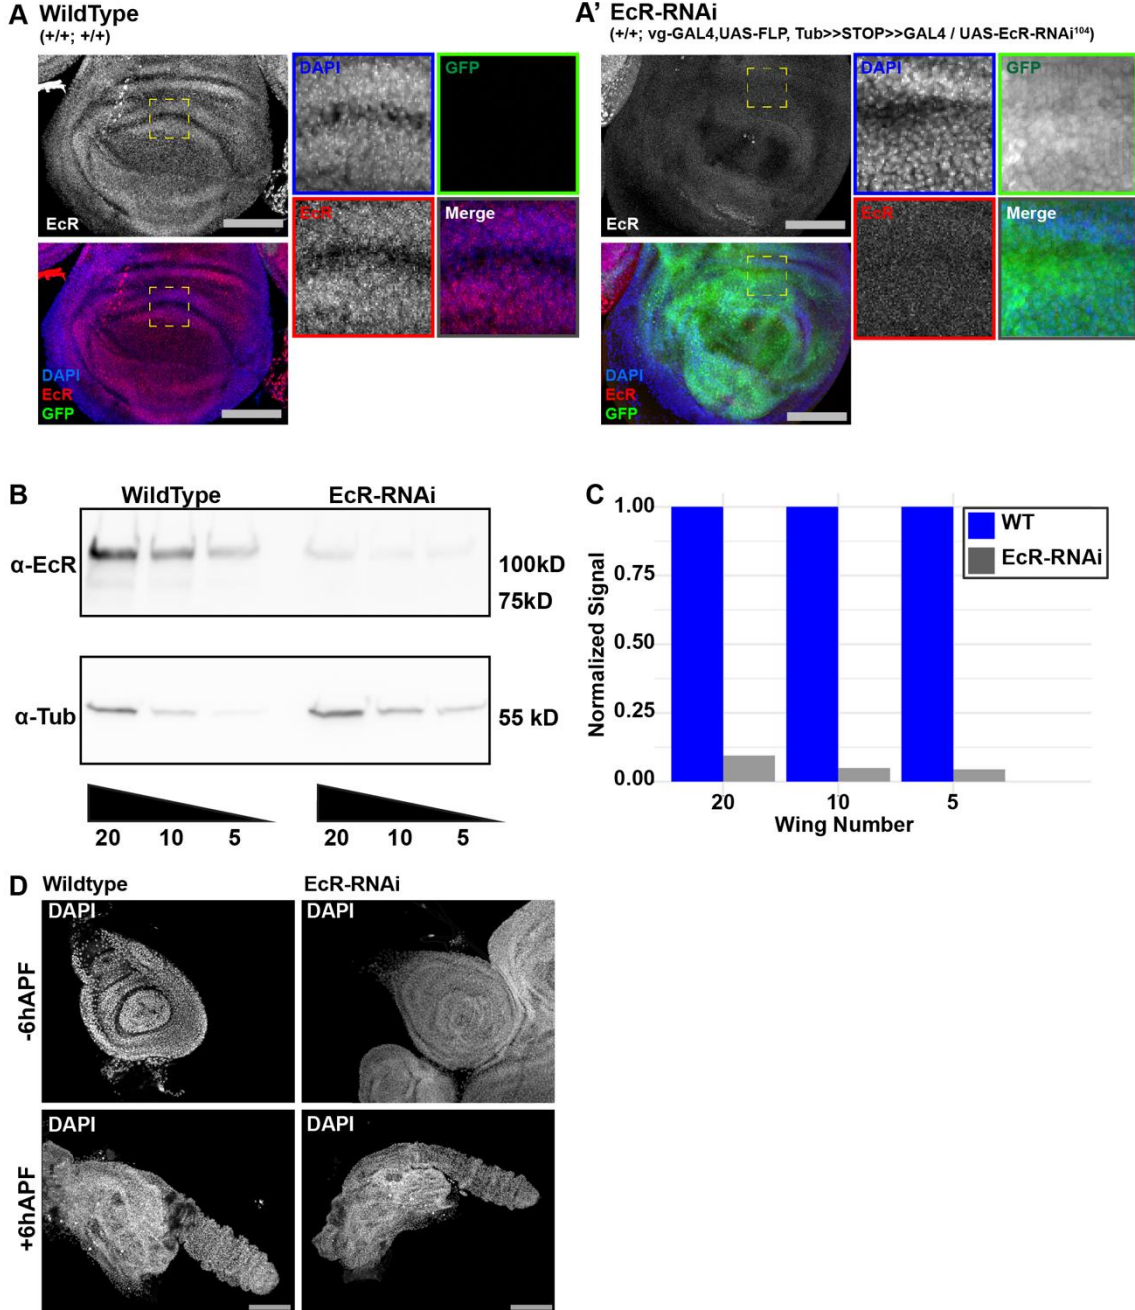

**Fig. S1. EcR-RNAi knock down is effective and does not result in systemic developmental arrest**

(A) WT and *vg-GAL4, UAS-FLP, Tub>>CD2>>GAL4, UAS-GFP; UAS-EcR-RNAi* (hereafter EcR-RNAi) wings at -6hAPF. Activity of *vg-GAL4* throughout the wing primordia causes flip-out of the STOP (CD2) cassette, resulting in persistent GAL4 expression throughout the wing. Location of insets is indicated by dashed boxes. (B) Western blots of EcR and alpha-tubulin levels in WT and EcR-RNAi wings from a serial dilution of wing tissue (wing number indicated below). (C) Quantification of western blots normalized to alpha-tubulin expressed as the fraction

of WT signal. (D) Legs from WT and EcR-RNAi legs at -6hAPF and +6hAPF. Scale bars are 100 $\mu$ m.



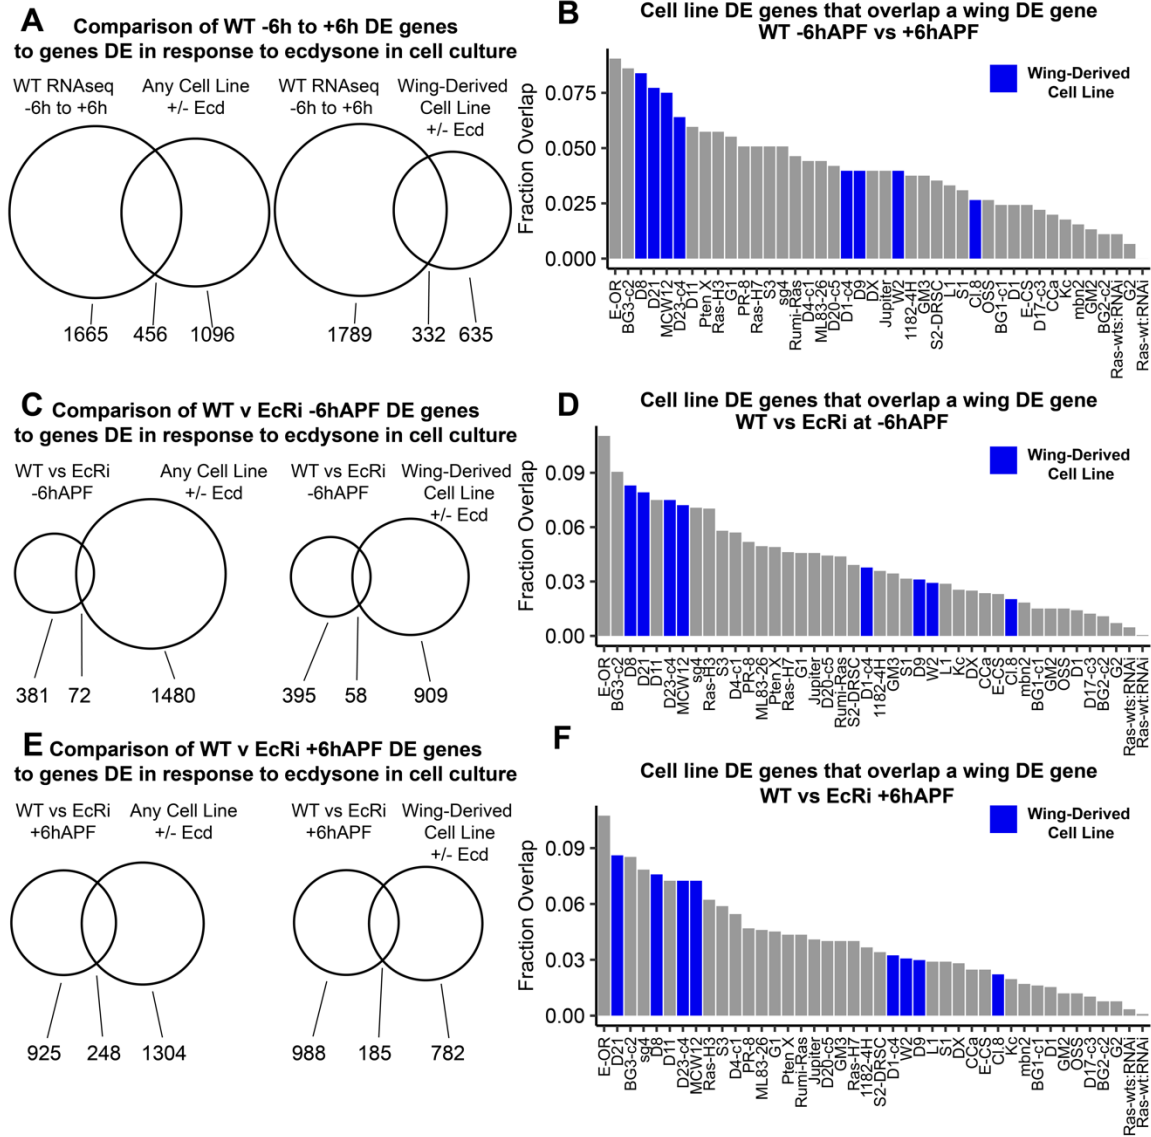

**Figure S2: Comparison with Stoiber et al., 2016 (20).**

(A) Venn diagrams depicting the overlap between WT -6hAPF to +6hAPF differentially expressed (DE) genes and those that respond to ecdysone in any cell line (left) or in any wing-derived cell line (right). Wing-derived cell lines are highlighted in blue in the bar plots. (B) Bar plot of the fraction of DE genes in WT wings between -6hAPF and +6hAPF that overlap a gene differentially expressed in response to ecdysone in each indicated cell line. (C-D) Venn diagrams and bar plots as in A-B for -6hAPF WT vs EcR-RNAi (EcRi) DE genes (D-E) Venn diagrams and bar plots as in A-B for +6hAPF WT vs EcRi DE genes.

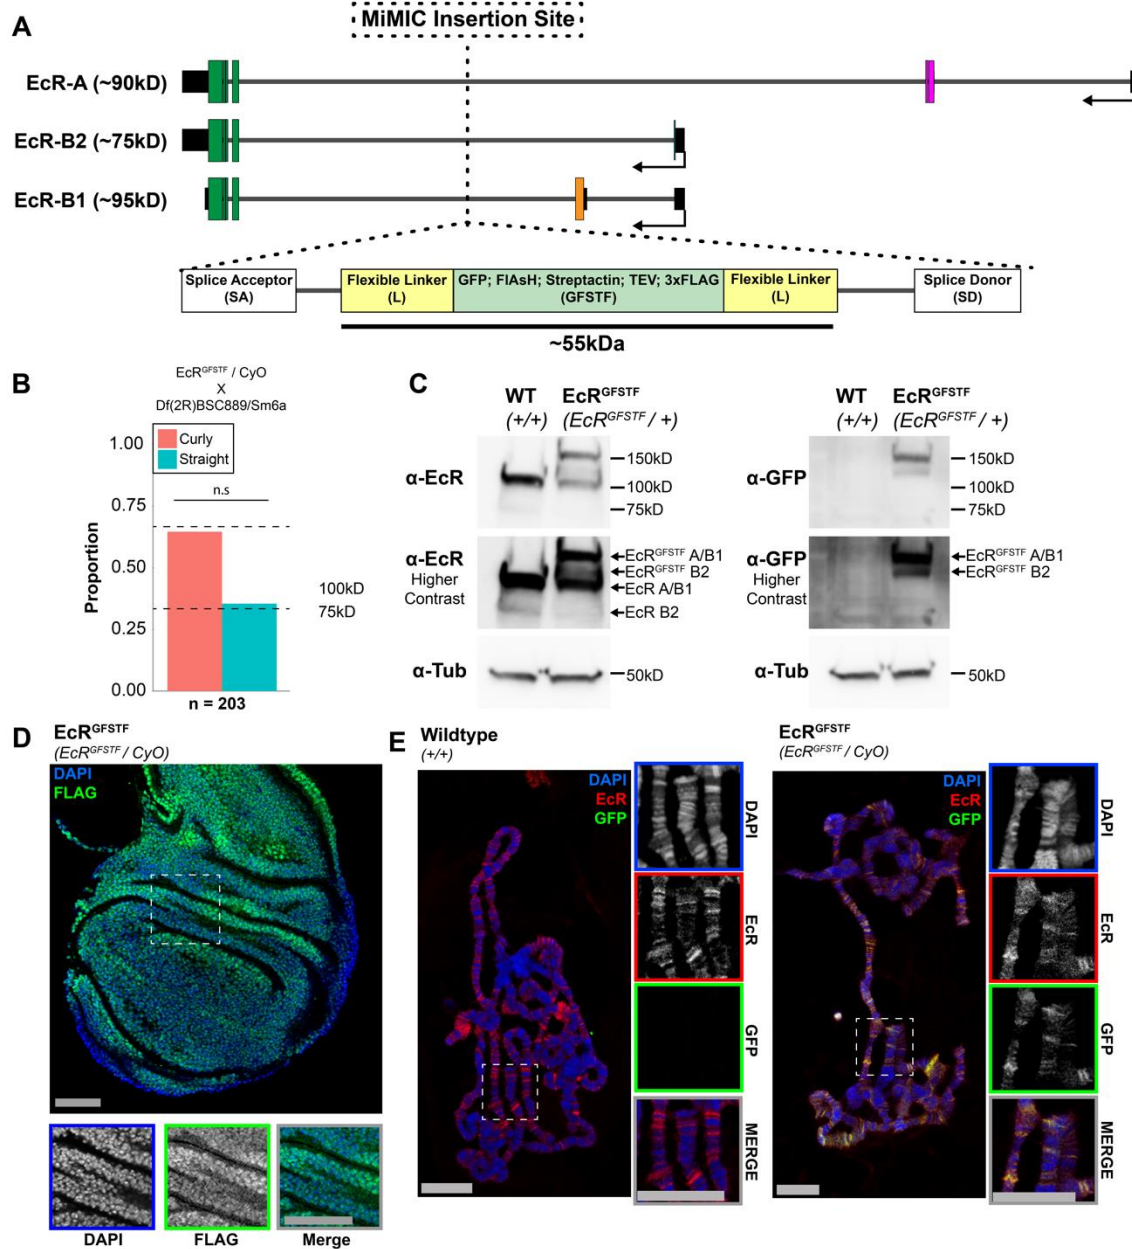

**Fig. S3. The  $EcR^{GFSTF}$  tag does not impair EcR function**

(A) Schematic of the  $EcR^{GFSTF}$  line generated by the *Drosophila* Gene Disruption Project (21–23). The line was generated through integration of a *Minos* transposon into a coding intron of the *EcR* locus. Subsequently, recombination-mediated cassette exchange was used to create an EcR protein trap containing the GFSTF tag (21, 22). The structure and size of the tag is indicated below the gene models. The insertion point is upstream of all exons shared between EcR isoforms and downstream of all isoform-specific exons. (B) Viability assay of  $EcR^{GFSTF}$  animals crossed to a deficiency spanning the EcR locus. Statistical significance was determined using a chi-squared test with an expected ratio of 1:2 homozygous to heterozygous animals. (C) Western blots of wings from  $EcR^{GFSTF}$  or WT animals stained for EcR or  $EcR^{GFSTF}$  (anti-GFP). EcR isoforms A/B1 and B2 are predicted to be ~150kD and ~125kD when the  $EcR^{GFSTF}$  tag is incorporated,

respectively. The western blot indicates both the 150kD and 125kD isoforms are trapped, and relative isoform abundance is maintained. (D) Immunostaining for EcR<sup>GFSTF</sup> (anti-FLAG) shows nuclear localization in wings. Scale bars are 50µm (E) Polytene squashes from *WT* or *EcR<sup>GFSTF</sup>* indicate EcR<sup>GFSTF</sup> binds DNA. Scale bars are 25µm. Dashed boxes indicate the location of insets.

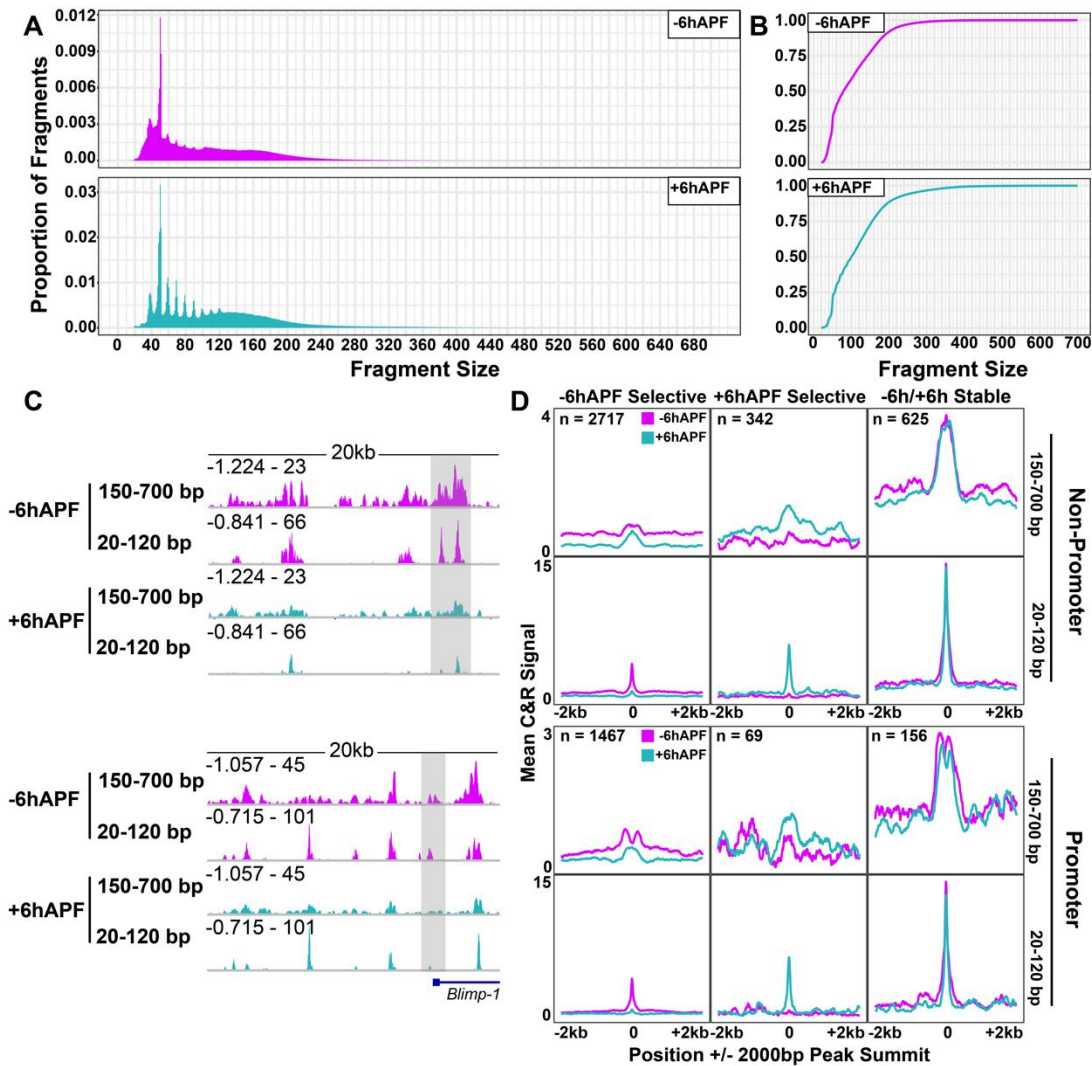

**Fig. S4. EcR CUT&RUN exhibits similar properties to those that have been previously reported**

(A) Histograms of fragment sizes from EcR CUT&RUN (C&R). (B) Cumulative distribution plot of fragment sizes. (C) Representative browser shots comparing EcR C&R signal from 20-120bp fragments and 150-700bp. (D) Average signal plots of EcR C&R signal split by overlap with annotated promoters and fragment size.

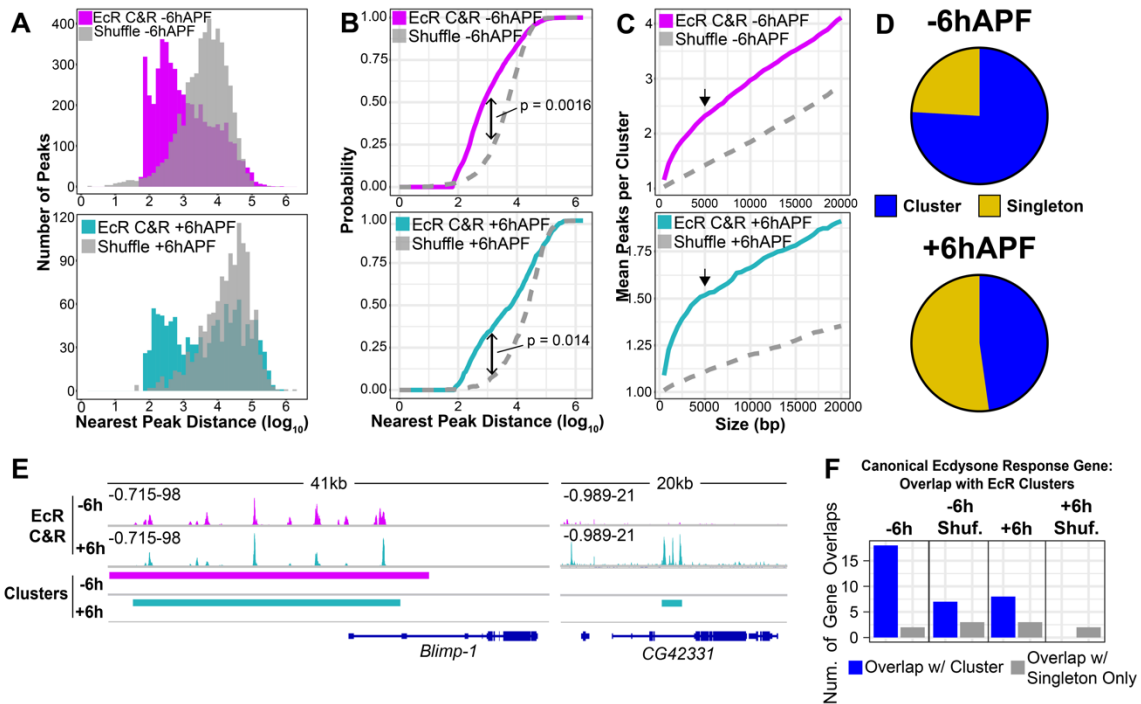

**Fig. S5. EcR peaks are clustered genome-wide**

(A) Histograms of distance of each EcR peak to its nearest neighbor compared to a peak set shuffled over FAIRE peaks. (B) Cumulative distribution plots of the distance of each EcR peak to its nearest neighbor compared to shuffled peaks. Distributions were compared with a KS-test. (C) The mean number of peaks that overlap at least one other peak using different sizes of EcR peak. Peaks within 5kb (arrow) of each other were merged into a single cluster for subsequent analyses. (D) Numbers of EcR peaks that fall into a cluster at -6hAPF and +6hAPF. (E) Examples of EcR clusters. (F) Numbers of canonical ecdysone-response genes that overlap an EcR cluster and those that only overlap an EcR singleton (ie. non-clustered peak) compared to clusters or singletons shuffled over open chromatin peaks. A list of canonical ecdysone response genes was generated by taking the union set of genes in gene ontology terms: Cellular response to ecdysone (GO:0071390); Steroid hormone mediated signaling pathway (GO:0043401) and appending all “Eip” (ecdysone induce protein) and “Imp” genes (40 total, see Table S3).

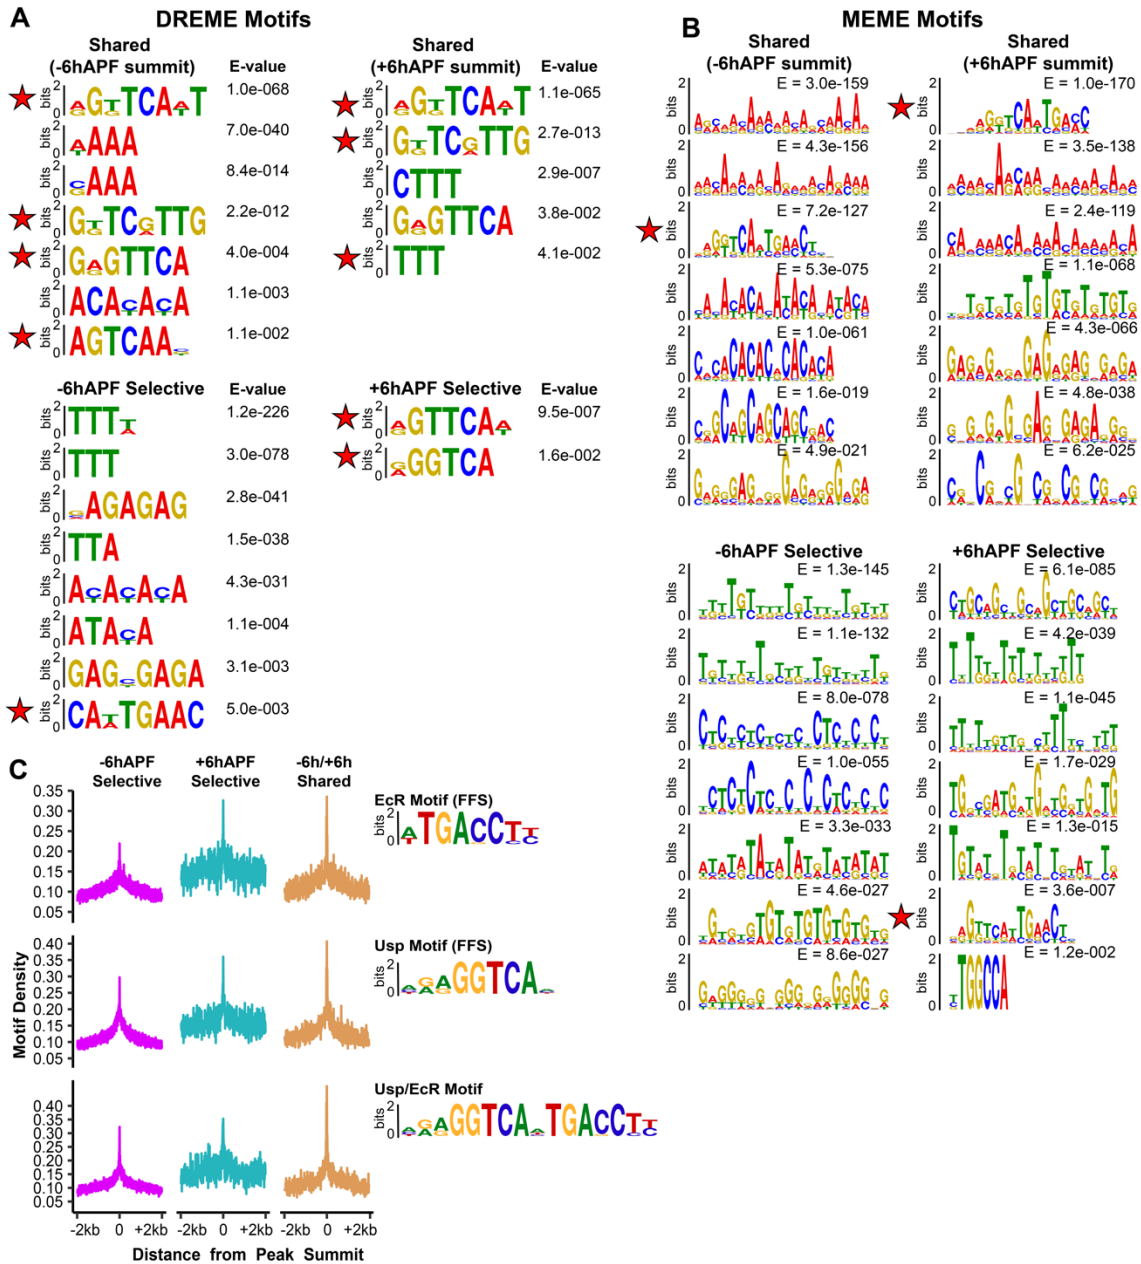

**Figure S6. Motifs identified in EcR binding sites**

(A) A full list of *de novo* motifs identified by DREME. (B) The top seven *de novo* motifs identified by MEME. For *de novo* motif identification, +/- 200bp from peak summit was used (see methods for details). Stars denote matches to the EcR motif or the EcR/Usp palindrome. (C) Motif density plots around the summits of EcR binding sites using motifs identified by bacterial 1-hybrid (17). The canonical motif was generated by combining the EcR and Usp PWMs together.



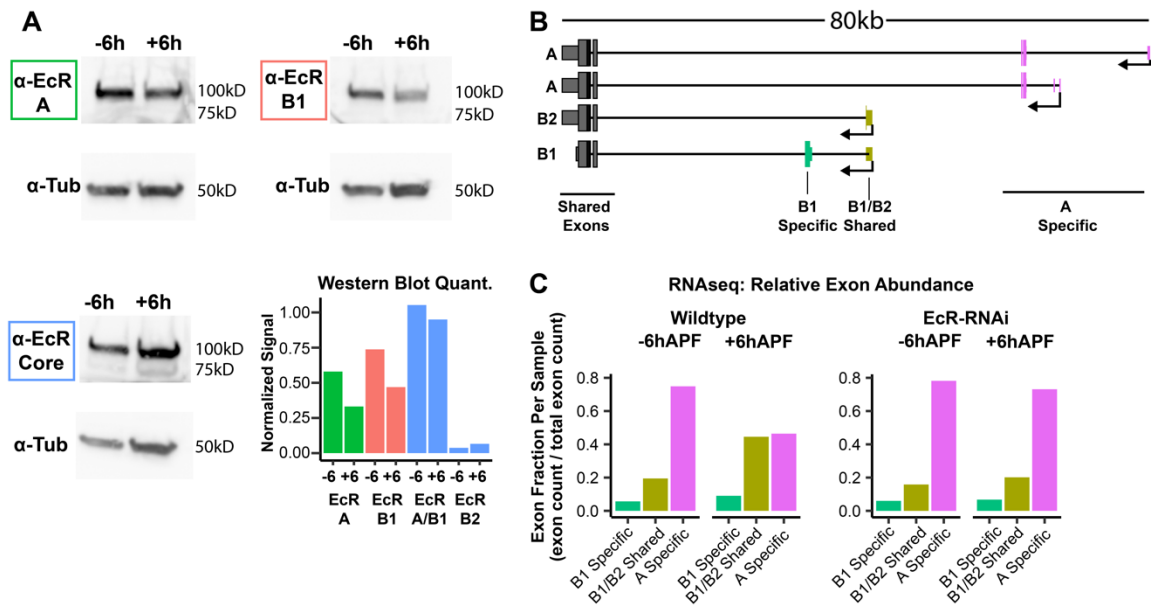

**Figure S7: EcR isoforms levels over time**

(A) Western blots depicting levels of EcR levels at  $-6\text{hAPF}$  and  $+6\text{hAPF}$  using isoform specific antibodies (EcR-A and EcR-B1) and an antibody that recognizes all EcR isoforms (EcR-core). Quantification of the core was performed by separately quantifying the top band, corresponding to EcR-A/B1, and the bottom band, corresponding to EcR-B2. The signal was normalized to tubulin. (B) Schematic of the EcR locus indicating exons shared between all isoforms (grey), exons specific to EcR-B1 (green), exons shared between EcR-B1 and EcR-B2 (yellow) and exons specific to EcR-A (pink). Note that EcR-A contains alternative 5'UTRs that do not affect the protein coding sequence. (C) Proportion of each exon type present at each time point. Exon counts were normalized to length.

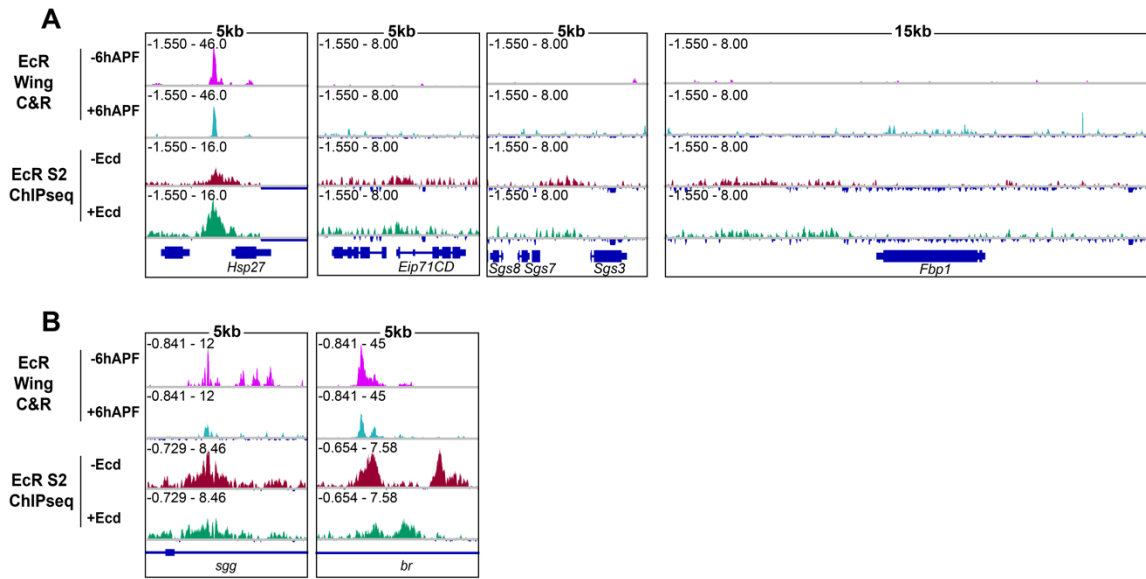

**Fig. S8. EcR binding is absent in wings and S2 cells from many sites previously identified as functional EcR binding sites in other tissues**

(A) Browser shots showing EcR C&R signal and S2 ChIPseq (24) at previously identified EcR binding sites. (B) Browser shots comparing precision of EcR binding between EcR and S2 cells.



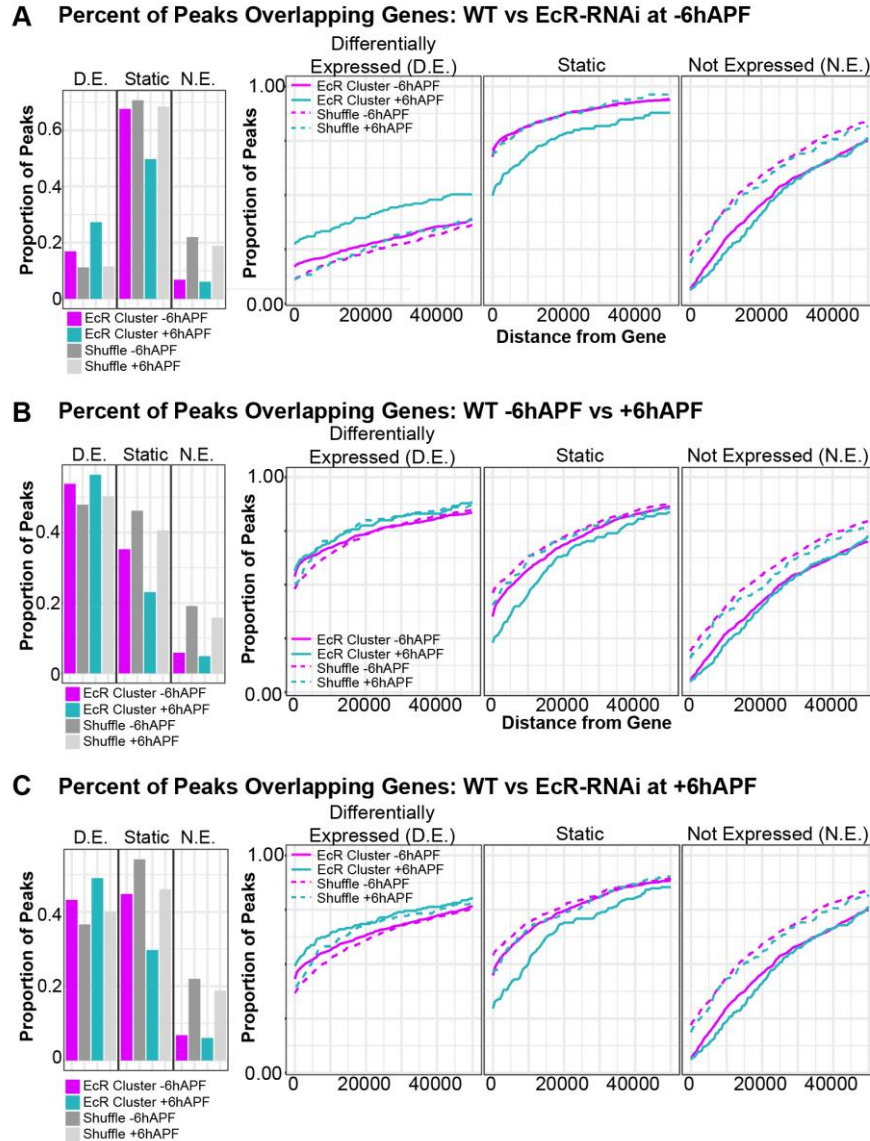

**Fig. S9. EcR binding is enriched at genes that are affected by EcR knockdown**

Percentage of EcR clusters that overlap (barplots, left), or fall within some distance of (cumulative distribution plots, right), a differentially expressed (D.E.), static, or not-expressed (N.E.) gene in RNAseq comparing (A) WT to EcR-RNAi wings at -6hAPF, (B) WT -6hAPF to +6hAPF, (C) WT to EcR-RNAi at +6hAPF. EcR peaks were compared to peaks randomly shuffled over FAIRE peaks. Differentially expressed genes were defined as genes with an adjusted p-value < 0.05. Not expressed genes were defined as genes that were filtered out by DESeq2 (padj = NA). Overlapping genes were defined as genes that overlapped a CUT&RUN peak by at least a single base pair. Note that separately examining up- and down-regulated genes in EcRi wings at either time point did not result in a statistically-significant correlation between EcR binding and differential gene expression.

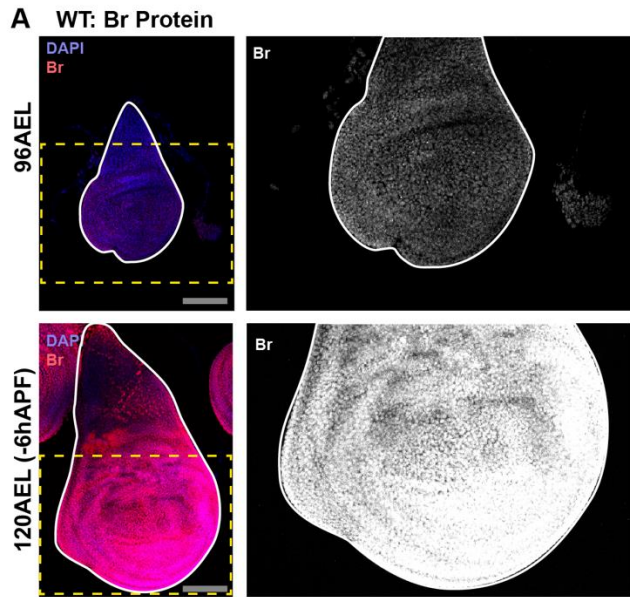

**Fig. S10. Broad protein levels increase with time.**

(A) Changes in Br protein (red) levels over time in WT wings between 96hrs after egg laying (96AEL) and 120AEL (-6hAPF). Scale bars are 100um. DAPI was used to stain nuclei.

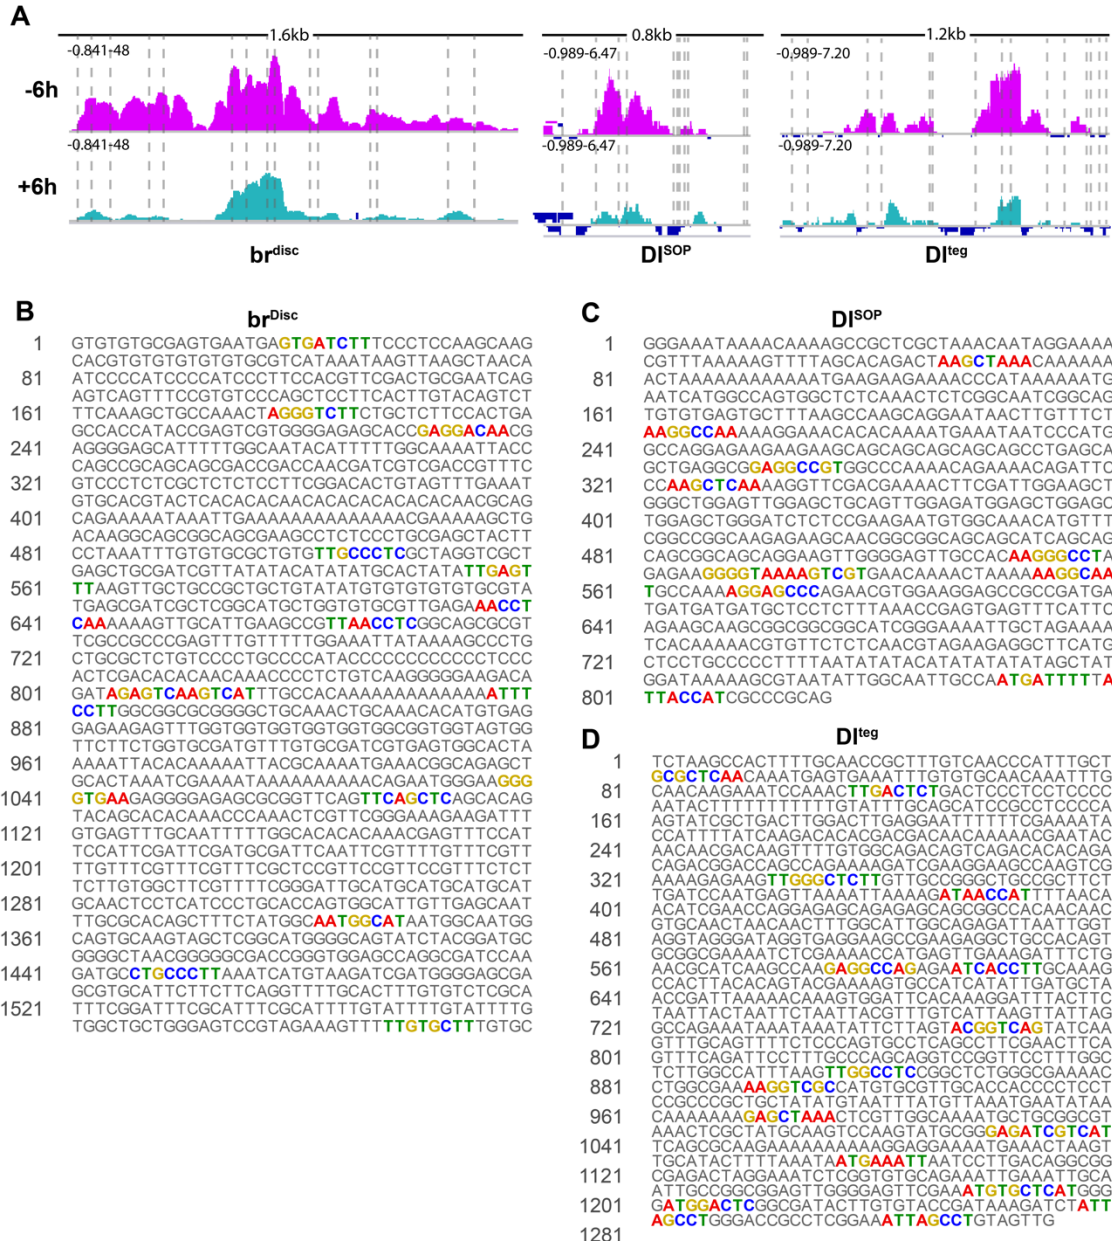

**Fig. S11. Motif content inside br and Dl enhancers.**

(A) Browser shots of the three enhancers examined in this study. The width of each browser corresponds to the enhancer boundaries. The locations of ECR motifs are indicated with dashed lines. (B-D) Enhancer sequences for *br<sup>disc</sup>*, *Dl<sup>SOP</sup>*, and *Dl<sup>leg</sup>*. ECR motifs are indicated by coloring the bases. The ECR motif from Fly Factor Survey (17) was used.

**A** *usp3* wings; Ac Stain

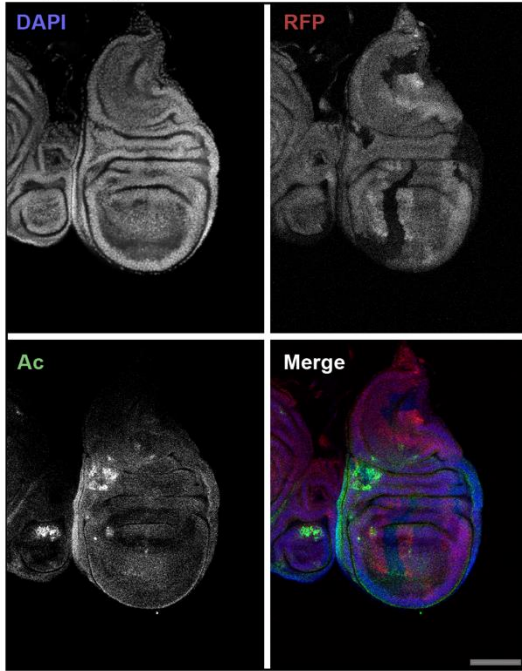

**A'** *usp3* wings; Ac Stain

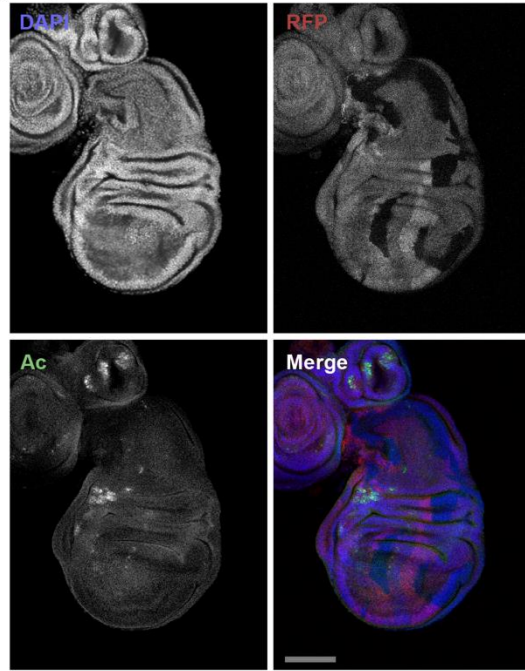

**Fig. S12: *usp3* clones do not result in cell fate changes**

(A) -6hAPF wings showing *usp3* mitotic clones stained for Ac. Clones are marked by the absence of RFP. Scale bars are 100 $\mu$ m. DAPI was used to stain nuclei.

**Table S1: Gene Ontology Terms for EcR Clusters at –6hAPF (top five)**

| Behavior                | Cluster | GO.ID      | Term                                                                                                        | p-value (-log10) |
|-------------------------|---------|------------|-------------------------------------------------------------------------------------------------------------|------------------|
| ECRi –6hAPF > WT –6hAPF | 1       | GO:0015833 | peptide transport                                                                                           | 2.508638306      |
| ECRi –6hAPF > WT –6hAPF | 1       | GO:0035848 | oviduct morphogenesis                                                                                       | 2.356547324      |
| ECRi –6hAPF > WT –6hAPF | 1       | GO:0010898 | positive regulation of triglyceride catabolic process                                                       | 2.356547324      |
| ECRi –6hAPF > WT –6hAPF | 1       | GO:0010716 | negative regulation of extracellular matrix disassembly                                                     | 2.356547324      |
| ECRi –6hAPF > WT –6hAPF | 1       | GO:0048621 | post-embryonic digestive tract morphogenesis                                                                | 2.356547324      |
| ECRi –6hAPF > WT –6hAPF | 2       | GO:0008063 | Toll signaling pathway                                                                                      | 4.886056648      |
| ECRi –6hAPF > WT –6hAPF | 2       | GO:0040003 | chitin-based cuticle development                                                                            | 3.744727495      |
| ECRi –6hAPF > WT –6hAPF | 2       | GO:0035074 | pupation                                                                                                    | 3.148741651      |
| ECRi –6hAPF > WT –6hAPF | 2       | GO:0006965 | positive regulation of biosynthetic process of antibacterial peptides active against Gram-positive bacteria | 2.928117993      |
| ECRi –6hAPF > WT –6hAPF | 2       | GO:0016045 | detection of bacterium                                                                                      | 2.928117993      |
| ECRi –6hAPF > WT –6hAPF | 3       | GO:0002028 | regulation of sodium ion transport                                                                          | 3.443697499      |
| ECRi –6hAPF > WT –6hAPF | 3       | GO:0045479 | vesicle targeting to fusome                                                                                 | 2.301899454      |
| ECRi –6hAPF > WT –6hAPF | 3       | GO:0042554 | superoxide anion generation                                                                                 | 2.301899454      |
| ECRi –6hAPF > WT –6hAPF | 3       | GO:0070731 | cGMP transport                                                                                              | 2.301899454      |
| ECRi –6hAPF > WT –6hAPF | 3       | GO:0051597 | response to methylmercury                                                                                   | 2.301899454      |
| ECRi –6hAPF > WT –6hAPF | 4       | GO:0040003 | chitin-based cuticle development                                                                            | 18.95860731      |
| ECRi –6hAPF > WT –6hAPF | 4       | GO:0003383 | apical constriction                                                                                         | 1.455931956      |
| ECRi –6hAPF > WT –6hAPF | 4       | GO:0008362 | chitin-based embryonic cuticle biosynthetic process                                                         | 1.387216143      |
| ECRi –6hAPF > WT –6hAPF | 4       | GO:0070252 | actin-mediated cell contraction                                                                             | 1.387216143      |
| ECRi –6hAPF > WT –6hAPF | 4       | GO:0042335 | cuticle development                                                                                         | 1.356547324      |
| ECRi –6hAPF > WT –6hAPF | 5       | GO:0031427 | response to methotrexate                                                                                    | 3.958607315      |
| ECRi –6hAPF > WT –6hAPF | 5       | GO:0007218 | neuropeptide signaling pathway                                                                              | 3.244125144      |
| ECRi –6hAPF > WT –6hAPF | 5       | GO:0006094 | gluconeogenesis                                                                                             | 2.36552273       |
| ECRi –6hAPF > WT –6hAPF | 5       | GO:0009408 | response to heat                                                                                            | 2.191789027      |
| ECRi –6hAPF > WT –6hAPF | 5       | GO:0035079 | polytene chromosome puffing                                                                                 | 1.998699067      |
| WT –6hAPF > ECRi –6hAPF | 1       | GO:0071390 | cellular response to ecdysone                                                                               | 3.602059991      |
| WT –6hAPF > ECRi –6hAPF | 1       | GO:0009597 | detection of virus                                                                                          | 2.872895202      |
| WT –6hAPF > ECRi –6hAPF | 1       | GO:0006833 | water transport                                                                                             | 2.571865206      |
| WT –6hAPF > ECRi –6hAPF | 1       | GO:0071329 | cellular response to sucrose stimulus                                                                       | 2.395773947      |
| WT –6hAPF > ECRi –6hAPF | 1       | GO:0007610 | behavior                                                                                                    | 2.381951903      |
| WT –6hAPF > ECRi –6hAPF | 2       | GO:0043401 | steroid hormone mediated signaling pathway                                                                  | 3.214670165      |
| WT –6hAPF > ECRi –6hAPF | 2       | GO:0045200 | establishment of neuroblast polarity                                                                        | 2.302770657      |
| WT –6hAPF > ECRi –6hAPF | 2       | GO:0090163 | establishment of epithelial cell planar polarity                                                            | 2.302770657      |
| WT –6hAPF > ECRi –6hAPF | 2       | GO:0072697 | protein localization to cell cortex                                                                         | 2.302770657      |
| WT –6hAPF > ECRi –6hAPF | 2       | GO:0016336 | establishment or maintenance of polarity of larval imaginal disc epithelium                                 | 2.206209615      |
| WT –6hAPF > ECRi –6hAPF | 3       | GO:0035320 | imaginal disc-derived wing hair site selection                                                              | 2.187086643      |

|                         |   |            |                                         |             |
|-------------------------|---|------------|-----------------------------------------|-------------|
| WT -6hAPF > ECRi -6hAPF | 3 | GO:0071632 | optomotor response                      | 2.187086643 |
| WT -6hAPF > ECRi -6hAPF | 3 | GO:0019752 | carboxylic acid metabolic process       | 2.173925197 |
| WT -6hAPF > ECRi -6hAPF | 3 | GO:0009408 | response to heat                        | 2.086186148 |
| WT -6hAPF > ECRi -6hAPF | 3 | GO:0001676 | long-chain fatty acid metabolic process | 1.943095149 |

**Table S2: Gene Ontology Terms for EcR Clusters at +6hAPF (top five)**

| Behavior                | Cluster | GO.ID      | Term                                                                                            | p-value (-log10) |
|-------------------------|---------|------------|-------------------------------------------------------------------------------------------------|------------------|
| ECRi +6hAPF > WT +6hAPF | 1       | GO:0006030 | chitin metabolic process                                                                        | 2.853871964      |
| ECRi +6hAPF > WT +6hAPF | 1       | GO:0090100 | positive regulation of transmembrane receptor protein serine/threonine kinase signaling pathway | 2.13076828       |
| ECRi +6hAPF > WT +6hAPF | 1       | GO:0006784 | heme a biosynthetic process                                                                     | 1.991399828      |
| ECRi +6hAPF > WT +6hAPF | 1       | GO:0046160 | heme a metabolic process                                                                        | 1.991399828      |
| ECRi +6hAPF > WT +6hAPF | 1       | GO:0001837 | epithelial to mesenchymal transition                                                            | 1.991399828      |
| ECRi +6hAPF > WT +6hAPF | 2       | GO:0007052 | mitotic spindle organization                                                                    | 11.32790214      |
| ECRi +6hAPF > WT +6hAPF | 2       | GO:0009267 | cellular response to starvation                                                                 | 10.85387196      |
| ECRi +6hAPF > WT +6hAPF | 2       | GO:0006364 | rRNA processing                                                                                 | 8.721246399      |
| ECRi +6hAPF > WT +6hAPF | 2       | GO:0022008 | neurogenesis                                                                                    | 6.958607315      |
| ECRi +6hAPF > WT +6hAPF | 2       | GO:0042254 | ribosome biogenesis                                                                             | 6.522878745      |
| ECRi +6hAPF > WT +6hAPF | 3       | GO:0002028 | regulation of sodium ion transport                                                              | 3.408935393      |
| ECRi +6hAPF > WT +6hAPF | 3       | GO:0055072 | iron ion homeostasis                                                                            | 2.747146969      |
| ECRi +6hAPF > WT +6hAPF | 3       | GO:0034605 | cellular response to heat                                                                       | 2.385102784      |
| ECRi +6hAPF > WT +6hAPF | 3       | GO:0042335 | cuticle development                                                                             | 2.12090412       |
| ECRi +6hAPF > WT +6hAPF | 3       | GO:0045479 | vesicle targeting to fusome                                                                     | 2.086716098      |
| ECRi +6hAPF > WT +6hAPF | 4       | GO:0040003 | chitin-based cuticle development                                                                | 17.04095861      |
| ECRi +6hAPF > WT +6hAPF | 4       | GO:0048082 | regulation of adult chitin-containing cuticle pigmentation                                      | 2.920818754      |
| ECRi +6hAPF > WT +6hAPF | 4       | GO:0045187 | regulation of circadian sleep/wake cycle, sleep                                                 | 2.537602002      |
| ECRi +6hAPF > WT +6hAPF | 4       | GO:0048066 | developmental pigmentation                                                                      | 2.283996656      |
| ECRi +6hAPF > WT +6hAPF | 4       | GO:0001692 | histamine metabolic process                                                                     | 2.229147988      |
| WT +6hAPF > ECRi +6hAPF | 1       | GO:0045214 | sarcomere organization                                                                          | 3.366531544      |
| WT +6hAPF > ECRi +6hAPF | 1       | GO:0007525 | somatic muscle development                                                                      | 2.950781977      |
| WT +6hAPF > ECRi +6hAPF | 1       | GO:0060402 | calcium ion transport into cytosol                                                              | 2.850780887      |
| WT +6hAPF > ECRi +6hAPF | 1       | GO:0006869 | lipid transport                                                                                 | 2.705533774      |
| WT +6hAPF > ECRi +6hAPF | 1       | GO:0010888 | negative regulation of lipid storage                                                            | 2.554395797      |
| WT +6hAPF > ECRi +6hAPF | 2       | GO:0055085 | transmembrane transport                                                                         | 3.251811973      |
| WT +6hAPF > ECRi +6hAPF | 2       | GO:0010025 | wax biosynthetic process                                                                        | 2.954677021      |
| WT +6hAPF > ECRi +6hAPF | 2       | GO:0007320 | insemination                                                                                    | 2.657577319      |
| WT +6hAPF > ECRi +6hAPF | 2       | GO:0006508 | proteolysis                                                                                     | 2.345823458      |
| WT +6hAPF > ECRi +6hAPF | 2       | GO:0042752 | regulation of circadian rhythm                                                                  | 2.301899454      |
| WT +6hAPF > ECRi +6hAPF | 3       | GO:0008299 | isoprenoid biosynthetic process                                                                 | 7.113509275      |
| WT +6hAPF > ECRi +6hAPF | 3       | GO:0051923 | sulfation                                                                                       | 3.698970004      |
| WT +6hAPF > ECRi +6hAPF | 3       | GO:0006805 | xenobiotic metabolic process                                                                    | 3.408935393      |
| WT +6hAPF > ECRi +6hAPF | 3       | GO:0003383 | apical constriction                                                                             | 3.107905397      |
| WT +6hAPF > ECRi +6hAPF | 3       | GO:0006030 | chitin metabolic process                                                                        | 2.728158393      |
| WT +6hAPF > ECRi +6hAPF | 4       | GO:0071329 | cellular response to sucrose stimulus                                                           | 2.431798276      |
| WT +6hAPF > ECRi +6hAPF | 4       | GO:0050709 | negative regulation of protein secretion                                                        | 2.251811973      |

|                         |   |            |                                         |             |
|-------------------------|---|------------|-----------------------------------------|-------------|
| WT +6hAPF > ECRi +6hAPF | 4 | GO:0001676 | long-chain fatty acid metabolic process | 1.954677021 |
| WT +6hAPF > ECRi +6hAPF | 4 | GO:0009651 | response to salt stress                 | 1.829738285 |
| WT +6hAPF > ECRi +6hAPF | 4 | GO:0006970 | response to osmotic stress              | 1.655607726 |



**Table S3: Canonical Ecdysone Response Genes**

| Category                                                | Gene ID  |
|---------------------------------------------------------|----------|
| GO:0043401 (Steroid Hormone Mediated Signaling Pathway) | dsf      |
| GO:0043401 (Steroid Hormone Mediated Signaling Pathway) | eg       |
| GO:0043401 (Steroid Hormone Mediated Signaling Pathway) | Eip75B   |
| GO:0043401 (Steroid Hormone Mediated Signaling Pathway) | Eip78C   |
| GO:0043401 (Steroid Hormone Mediated Signaling Pathway) | ERR      |
| GO:0043401 (Steroid Hormone Mediated Signaling Pathway) | ftz-fl   |
| GO:0043401 (Steroid Hormone Mediated Signaling Pathway) | Hnf4     |
| GO:0043401 (Steroid Hormone Mediated Signaling Pathway) | Hr38     |
| GO:0043401 (Steroid Hormone Mediated Signaling Pathway) | Hr39     |
| GO:0043401 (Steroid Hormone Mediated Signaling Pathway) | Hr3      |
| GO:0043401 (Steroid Hormone Mediated Signaling Pathway) | Hr51     |
| GO:0043401 (Steroid Hormone Mediated Signaling Pathway) | Hr78     |
| GO:0043401 (Steroid Hormone Mediated Signaling Pathway) | Hr83     |
| GO:0043401 (Steroid Hormone Mediated Signaling Pathway) | Hr96     |
| GO:0043401 (Steroid Hormone Mediated Signaling Pathway) | knrl     |
| GO:0043401 (Steroid Hormone Mediated Signaling Pathway) | svp      |
| GO:0043401 (Steroid Hormone Mediated Signaling Pathway) | tll      |
| GO:0043401 (Steroid Hormone Mediated Signaling Pathway) | usp      |
| GO:0071390 (Cellular Response to Ecdysone)              | Blimp-1  |
| GO:0071390 (Cellular Response to Ecdysone)              | br       |
| GO:0071390 (Cellular Response to Ecdysone)              | Eip93F   |
| GO:0071390 (Cellular Response to Ecdysone)              | let-7-C  |
| GO:0071390 (Cellular Response to Ecdysone)              | Lpt      |
| GO:0071390 (Cellular Response to Ecdysone)              | MED27    |
| GO:0071390 (Cellular Response to Ecdysone)              | Sgs3     |
| GO:0071390 (Cellular Response to Ecdysone)              | usp      |
| GO:0071390 (Cellular Response to Ecdysone)              | Utx      |
| Other Ecdysone Response Genes                           | Eip55E   |
| Other Ecdysone Response Genes                           | Eip63E   |
| Other Ecdysone Response Genes                           | Eip63F-1 |
| Other Ecdysone Response Genes                           | Eip63F-2 |
| Other Ecdysone Response Genes                           | Eip71CD  |
| Other Ecdysone Response Genes                           | Eip74EF  |
| Other Ecdysone Response Genes                           | Imp      |
| Other Ecdysone Response Genes                           | ImpE1    |
| Other Ecdysone Response Genes                           | ImpE2    |
| Other Ecdysone Response Genes                           | ImpE3    |

|                               |       |
|-------------------------------|-------|
| Other Ecdysone Response Genes | ImpL1 |
| Other Ecdysone Response Genes | ImpL2 |
| Other Ecdysone Response Genes | ImpL3 |

**Table S4: Gene Ontology Terms for EcR Binding Sites (top five)**

| Overlap Type   | GO.ID      | Term                                                                 | p-value<br>(-log10) |
|----------------|------------|----------------------------------------------------------------------|---------------------|
| +6hAPF Unique  | GO:0007476 | imaginal disc-derived wing morphogenesis                             | 4.040958608         |
| +6hAPF Unique  | GO:0002009 | morphogenesis of an epithelium                                       | 3.420216403         |
| +6hAPF Unique  | GO:0035152 | regulation of tube architecture, open tracheal system                | 3.366531544         |
| +6hAPF Unique  | GO:0018107 | peptidyl-threonine phosphorylation                                   | 3.236572006         |
| +6hAPF Unique  | GO:0007370 | ventral furrow formation                                             | 3.207608311         |
| -6h/+6h Stable | GO:0007476 | imaginal disc-derived wing morphogenesis                             | 8.142667504         |
| -6h/+6h Stable | GO:0048190 | wing disc dorsal/ventral pattern formation                           | 6.259637311         |
| -6h/+6h Stable | GO:0007156 | homophilic cell adhesion via plasma membrane adhesion molecules      | 5.15490196          |
| -6h/+6h Stable | GO:0007411 | axon guidance                                                        | 4.853871964         |
| -6h/+6h Stable | GO:0016318 | ommatidial rotation                                                  | 4.769551079         |
| -6hAPF Unique  | GO:0000122 | negative regulation of transcription from RNA polymerase II promoter | 20.92081875         |
| -6hAPF Unique  | GO:0007476 | imaginal disc-derived wing morphogenesis                             | 20.76955108         |
| -6hAPF Unique  | GO:0007411 | axon guidance                                                        | 15.38721614         |
| -6hAPF Unique  | GO:0045944 | positive regulation of transcription from RNA polymerase II promoter | 14.88605665         |
| -6hAPF Unique  | GO:0035277 | spiracle morphogenesis, open tracheal system                         | 12.18045606         |

## References

1. Jiang L, Pearson JC, Crews ST (2010) Diverse modes of *Drosophila* tracheal fusion cell transcriptional regulation. *Mech Dev* 127(5–6):265–280.
2. McKay DJ, Lieb JD (2013) A common set of DNA regulatory elements shapes *Drosophila* appendages. *Dev Cell* 27(3):306–318.
3. Skene PJ, Henikoff JG, Henikoff S (2018) Targeted in situ genome-wide profiling with high efficiency for low cell numbers. *Nat Protoc* 13(5):1006–1019.
4. Dobin A, et al. (2013) STAR: ultrafast universal RNA-seq aligner. *Bioinformatics* 29(1):15–21.
5. Liao Y, Smyth GK, Shi W (2013) The Subread aligner: fast, accurate and scalable read mapping by seed-and-vote. *Nucleic Acids Res* 41(10):e108.
6. Love MI, Huber W, Anders S (2014) Moderated estimation of fold change and dispersion for RNA-seq data with DESeq2. *Genome Biology* 15:550.
7. Rahnenfuhrer AAJ (2018) topGO. *topGO: Enrichment Analysis for Gene Ontology*. Available at: <http://bioconductor.org/packages/topGO/> [Accessed November 26, 2018].
8. Lawrence M, et al. (2013) Software for computing and annotating genomic ranges. *PLoS Comput Biol* 9(8):e1003118.
9. Langmead B, Salzberg SL (2012) Fast gapped-read alignment with Bowtie 2. *Nat Methods* 9(4):357–359.
10. Li H, et al. (2009) The Sequence Alignment/Map format and SAMtools. *Bioinformatics* 25(16):2078–2079.
11. Quinlan AR, Hall IM (2010) BEDTools: a flexible suite of utilities for comparing genomic features. *Bioinformatics* 26(6):841–842.
12. Kent WJ, Zweig AS, Barber G, Hinrichs AS, Karolchik D (2010) BigWig and BigBed: enabling browsing of large distributed datasets. *Bioinformatics* 26(17):2204–2207.
13. Zhang Y, et al. (2008) Model-based Analysis of ChIP-Seq (MACS). *Genome Biology* 9:R137.
14. Stempor P, Ahringer J (2016) SeqPlots - Interactive software for exploratory data analyses, pattern discovery and visualization in genomics. *Wellcome Open Res* 1:14.
15. Zhu LJ, et al. (2010) ChIPpeakAnno: a Bioconductor package to annotate ChIP-seq and ChIP-chip data. *BMC Bioinformatics* 11:237.
16. Bailey TL (2011) DREME: motif discovery in transcription factor ChIP-seq data. *Bioinformatics* 27(12):1653–1659.
17. Zhu LJ, et al. (2011) FlyFactorSurvey: a database of *Drosophila* transcription factor binding specificities determined using the bacterial one-hybrid system. *Nucleic Acids Res* 39(Database issue):D111–117.

18. Grant CE, Bailey TL, Noble WS (2011) FIMO: scanning for occurrences of a given motif. *Bioinformatics* 27(7):1017–1018.
19. Crickmore MA, Mann RS (2006) Hox control of organ size by regulation of morphogen production and mobility. *Science* 313(5783):63–68.
20. Stoiber M, Celniker S, Cherbas L, Brown B, Cherbas P (2016) Diverse Hormone Response Networks in 41 Independent Drosophila Cell Lines. *G3* 6(3):683–694.
21. Nagarkar-Jaiswal S, et al. (2015) A library of MiMICs allows tagging of genes and reversible, spatial and temporal knockdown of proteins in Drosophila. *eLife* 4:e05338.
22. Nagarkar-Jaiswal S, et al. (2015) A genetic toolkit for tagging intronic MiMIC containing genes. *eLife* 4:e08469.
23. Venken KJT, et al. (2011) MiMIC: a highly versatile transposon insertion resource for engineering Drosophila melanogaster genes. *Nat Methods* 8(9):737–743.
24. Shlyueva D, et al. (2014) Hormone-responsive enhancer-activity maps reveal predictive motifs, indirect repression, and targeting of closed chromatin. *Mol Cell* 54(1):180–192.
